# Supplementary material
Source: PubMed Central journal article supplement (PMC3402020)
Supplement: ci3001277_si_001.pdf [file ci3001277_si_001.pdf]

# Supporting Information For

## ZINC – A free tool to discover chemistry for biology

John J. Irwin\*, Teague Sterling, Michael M. Mysinger, Erin S. Bolstad, Ryan G. Coleman.

Department of Pharmaceutical Chemistry, Byers Hall, University of California San Francisco, 1700 4<sup>th</sup> St,  
Box 2550, San Francisco CA 94158-2330.

Corresponding author: [jjj@cgl.ucsf.edu](mailto:jjj@cgl.ucsf.edu)

Keywords: ligand discovery, chemical biology, virtual screening, computational drug discovery, chemical informatics.

Running title: The ZINC database and tool

## TABLE OF CONTENTS

### **1.Catalog details.**

Supplement to Table 1

All catalogs: <http://zinc.docking.org/browse/catalogs/all>

See also:

Purchasable: <http://zinc.docking.org/browse/catalogs/purchasable>

Annotated: <http://zinc.docking.org/browse/catalogs/annotated>

### **2.Filtering rules.**

<http://filtering.docking.org>

Primary commercial catalog filtering: [http://blaster.docking.org/filtering/rules\\_default.txt](http://blaster.docking.org/filtering/rules_default.txt)

Annotated catalogs: [http://blaster.docking.org/filtering/rules\\_annotated.txt](http://blaster.docking.org/filtering/rules_annotated.txt)

Benign functionality filters:

a. [http://blaster.docking.org/filtering/rules\\_yuck.txt](http://blaster.docking.org/filtering/rules_yuck.txt)

b. [http://blaster.docking.org/filtering/rules\\_yuck1.txt](http://blaster.docking.org/filtering/rules_yuck1.txt)

### **3.ZINC query construction syntax**

<http://wiki.bkslab.org/index.php/ZINCCL>

### **4.Quick search bar guide.**

<http://wiki.bkslab.org/index.php/QSB>

### **5.How to link to ZINC.**

<http://wiki.bkslab.org/index.php/How to link to ZINC>

### **6. ZINC processing pipeline**

<http://wiki.bkslab.org/index.php/ZPP>

[Tiles](#) [List](#) [Diversity](#) [Purchasable](#) [SC](#) [BB](#) [NP](#) [MOD](#) [Agents](#) [PBCs](#) [Annotated](#) [Collabocules](#) [BKS](#) [EFI](#)

## All Catalogs (212 in total)

All ZINC source catalogs - commercial vendors and annotated databases - as a sortable list. Use the tabs to the right to break down this list into distinct classes.

These databases have been provided to us under collaborative agreements with each respective catalog owner. Catalogs have been filtered for drug discovery relevance, and thus compounds in the original catalog may not be in ZINC. Some documentation on ZINC subsets is available.

ZINC may be used free of charge for research by individuals and institutions. Whereas you are free to share the results of a ZINC search or a screen of molecules from ZINC, you may not redistribute major portions of ZINC without the express written permission of John Irwin.

| Vendor                                                                              | Name               | Last Updated | Purchasability | Vendor Catalog Size | ZINC Entries | Filtered | Unique  | Browse                                | Download Usual Subset              |
|-------------------------------------------------------------------------------------|--------------------|--------------|----------------|---------------------|--------------|----------|---------|---------------------------------------|------------------------------------|
|    | ACB Blocks         | 2011-12-06   | Items In Stock | 6273                | 5519         | 122      | 512     | Overview<br>Basic<br>Targets<br>Focus | SMILES<br>SDF<br>MOL2<br>Flexibase |
|    | Accela ChemBio Inc | 2010.5       | Items In Stock | 3124                | 3300         | 169      | 294     | Overview<br>Basic<br>Targets<br>Focus | SMILES<br>SDF<br>MOL2<br>Flexibase |
|    | Acros Organics     | 2012-02-02   | Items In Stock | 20953               | 15514        | 3023     | 215     | Overview<br>Basic<br>Targets<br>Focus | SMILES<br>SDF<br>MOL2<br>Flexibase |
|   | Adesis             | 2011-08-22   | Items In Stock | 1482                | 1297         | 272      | 329     | Overview<br>Basic<br>Targets<br>Focus | SMILES<br>SDF<br>MOL2<br>Flexibase |
|  | AF ChemPharm       | 2012-02-01   | Items In Stock | 1051                | 1352         | 35       | 943     | Overview<br>Basic<br>Targets<br>Focus | SMILES<br>SDF<br>MOL2<br>Flexibase |
|  | Aldrich CPR        | 2012-01-20   | Items In Stock | 169308              | 181332       | 6871     | 71634   | Overview<br>Basic<br>Targets<br>Focus | SMILES<br>SDF<br>MOL2<br>Flexibase |
|  | Alfa Pyridines     | 2010.11      | Items In Stock | 61654               | 59648        | 10410    | 54929   | Overview<br>Basic<br>Targets<br>Focus | SMILES<br>SDF<br>MOL2<br>Flexibase |
|  | Alfa-Aesar         | 2012-01-27   | Items In Stock | 25102               | 16440        | 10440    | 945     | Overview<br>Basic<br>Targets<br>Focus | SMILES<br>SDF<br>MOL2<br>Flexibase |
|  | Amadis Chemical    | 2011-12-13   | Items In Stock | 39265               | 41381        | 4795     | 9198    | Overview<br>Basic<br>Targets<br>Focus | SMILES<br>SDF<br>MOL2<br>Flexibase |
|  | Ambinter           | 2012-01-30   | Boutique       | 5053511             | 5119481      | 154919   | 1089911 | Overview<br>Basic<br>Targets<br>Focus | SMILES<br>SDF<br>MOL2<br>Flexibase |

|                                                                                     |                                          |            |                          |       |       |      |       |                                       |                                    |
|-------------------------------------------------------------------------------------|------------------------------------------|------------|--------------------------|-------|-------|------|-------|---------------------------------------|------------------------------------|
|     | Ambinter Natural Products                | 2011-12-07 | Boutique                 | 32998 | 36057 | 4317 | 2943  | Overview<br>Basic<br>Targets<br>Focus | SMILES<br>SDF<br>MOL2<br>Flexibase |
|    | Amidohydrolase AH-EFI                    | 2011-11-01 | Collaborations Only      | 470   | 848   | 2    | 20    | Overview<br>Basic<br>Targets<br>Focus | SMILES<br>SDF<br>MOL2<br>Flexibase |
|    | Amino acid derivatives (EFI)             | 2011-12-20 | Collaborations Only      | 246   | 243   | 0    | 20    | Overview<br>Basic<br>Targets<br>Focus | SMILES<br>SDF<br>MOL2<br>Flexibase |
|    | AmpC ligands                             | 2008.7     | Not for Sale (Annotated) | 21    | 21    | 0    | 0     | Overview<br>Basic<br>Targets<br>Focus | SMILES<br>SDF<br>MOL2<br>Flexibase |
|    | AmpC non-binders                         | 2008.7     | Not for Sale (Annotated) | 84    | 119   | 0    | 17    | Overview<br>Basic<br>Targets<br>Focus | SMILES<br>SDF<br>MOL2<br>Flexibase |
|    | AnalytiCon Discovery Natural Derivatives | 2012-02-16 | Items In Stock           | 23278 | 24488 | 41   | 1690  | Overview<br>Basic<br>Targets<br>Focus | SMILES<br>SDF<br>MOL2<br>Flexibase |
|  | AnalytiCon Discovery NP                  | 2012-02-15 | Items In Stock           | 4719  | 10119 | 933  | 3501  | Overview<br>Basic<br>Targets<br>Focus | SMILES<br>SDF<br>MOL2<br>Flexibase |
|  | AnalytiCon Discovery NP BB               | 2012-02-15 | Items In Stock           | 148   | 149   | 0    | 64    | Overview<br>Basic<br>Targets<br>Focus | SMILES<br>SDF<br>MOL2<br>Flexibase |
|  | Angene                                   | 2012-02-15 | Items In Stock           | 2687  | 2684  | 75   | 520   | Overview<br>Basic<br>Targets<br>Focus | SMILES<br>SDF<br>MOL2<br>Flexibase |
|  | APAC Sourcing Solutions                  | 2008.12    | Agent                    | 30312 | 31587 | 3155 | 12251 | Overview<br>Basic<br>Targets<br>Focus | SMILES<br>SDF<br>MOL2<br>Flexibase |
|  | Apeiron Synthesis                        | 2012-01-02 | Items In Stock           | 12    | 12    | 0    | 3     | Overview<br>Basic<br>Targets<br>Focus | SMILES<br>SDF<br>MOL2<br>Flexibase |
|  | APIChem                                  | 2010.2     | Items In Stock           | 13844 | 14773 | 1326 | 376   | Overview<br>Basic<br>Targets<br>Focus | SMILES<br>SDF<br>MOL2<br>Flexibase |
|  | Apollo Scientific                        | 2012-02-03 | Items In Stock           | 44578 | 43850 | 5409 | 8327  | Overview<br>Basic<br>Targets          | SMILES<br>SDF<br>MOL2              |

|      |                             |            |                |        |        |       |       |                                       | Focus                              | Flexibase |
|-------------------------------------------------------------------------------------|-----------------------------|------------|----------------|--------|--------|-------|-------|---------------------------------------|------------------------------------|-----------|
|    | Aronis                      | 2011-08-22 | Items In Stock | 24118  | 27859  | 812   | 112   | Overview<br>Basic<br>Targets<br>Focus | SMILES<br>SDF<br>MOL2<br>Flexibase |           |
|    | Aronis (Make on Request)    | 2011-11-16 | Made On Demand | 302612 | 254331 | 21326 | 94970 | Overview<br>Basic<br>Targets<br>Focus | SMILES<br>SDF<br>MOL2<br>Flexibase |           |
|    | Aronis BuildingBlocks       | 2011-08-22 | Items In Stock | 1374   | 1709   | 27    | 8     | Overview<br>Basic<br>Targets<br>Focus | SMILES<br>SDF<br>MOL2<br>Flexibase |           |
|    | ARVI                        | 2011-09-06 | Items In Stock | 90044  | 82878  | 10751 | 535   | Overview<br>Basic<br>Targets<br>Focus | SMILES<br>SDF<br>MOL2<br>Flexibase |           |
|    | Asinex                      | 2011-10-05 | Items In Stock | 360240 | 508494 | 17456 | 41910 | Overview<br>Basic<br>Targets<br>Focus | SMILES<br>SDF<br>MOL2<br>Flexibase |           |
|   | Asinex Building Blocks      | 2012-03-01 | Items In Stock | 37429  | 45680  | 169   | 534   | Overview<br>Basic<br>Targets<br>Focus | SMILES<br>SDF<br>MOL2<br>Flexibase |           |
|  | AsisChem                    | 2011-12-06 | Items In Stock | 212949 | 235555 | 12814 | 897   | Overview<br>Basic<br>Targets<br>Focus | SMILES<br>SDF<br>MOL2<br>Flexibase |           |
|  | AsisChem Building Blocks    | 2011-12-06 | Items In Stock | 18514  | 21401  | 610   | 1461  | Overview<br>Basic<br>Targets<br>Focus | SMILES<br>SDF<br>MOL2<br>Flexibase |           |
|  | AstaTech                    | 2011-08-23 | Items In Stock | 8467   | 9067   | 267   | 1060  | Overview<br>Basic<br>Targets<br>Focus | SMILES<br>SDF<br>MOL2<br>Flexibase |           |
|  | Asymchem                    | 2007-05    | Items In Stock | 1029   | 711    | 286   | 187   | Overview<br>Basic<br>Targets<br>Focus | SMILES<br>SDF<br>MOL2<br>Flexibase |           |
|  | Bachem                      | 2012-01-08 | Items In Stock | 4776   | 4355   | 351   | 1770  | Overview<br>Basic<br>Targets<br>Focus | SMILES<br>SDF<br>MOL2<br>Flexibase |           |
|  | Beijing Advanced Technology | 2012-02-01 | Items In Stock | 32     | 32     | 0     | 4     | Overview<br>Basic<br>Targets<br>Focus | SMILES<br>SDF<br>MOL2<br>Flexibase |           |

|                                                                                     |                           |            |                                |         |         |       |       |                                       |                                    |
|-------------------------------------------------------------------------------------|---------------------------|------------|--------------------------------|---------|---------|-------|-------|---------------------------------------|------------------------------------|
|     | Bepharma Ltd              | 2012-01-05 | Items In Stock                 | 5456    | 5620    | 216   | 201   | Overview<br>Basic<br>Targets<br>Focus | SMILES<br>SDF<br>MOL2<br>Flexibase |
|    | BindingDB.org             | 2012-01-03 | Not for Sale<br>(Annotated)    | 345529  | 400626  | 26865 | 39162 | Overview<br>Basic<br>Targets<br>Focus | SMILES<br>SDF<br>MOL2<br>Flexibase |
|    | BioBlocks                 | 2011-12-06 | Items In Stock                 | 2989    | 3024    | 6     | 157   | Overview<br>Basic<br>Targets<br>Focus | SMILES<br>SDF<br>MOL2<br>Flexibase |
|    | BioSynth                  | 2012-02-02 | Items In Stock                 | 6121    | 5968    | 1067  | 1507  | Overview<br>Basic<br>Targets<br>Focus | SMILES<br>SDF<br>MOL2<br>Flexibase |
|    | Bosche Scientific         | 2011-08-22 | Items In Stock                 | 17512   | 18893   | 1138  | 1555  | Overview<br>Basic<br>Targets<br>Focus | SMILES<br>SDF<br>MOL2<br>Flexibase |
|    | Calbiochem                | 2008.1     | Items In Stock                 | 665     | 761     | 101   | 369   | Overview<br>Basic<br>Targets<br>Focus | SMILES<br>SDF<br>MOL2<br>Flexibase |
|   | Cayman Chemical           | 2012-02-01 | Items In Stock                 | 2525    | 4715    | 108   | 3096  | Overview<br>Basic<br>Targets<br>Focus | SMILES<br>SDF<br>MOL2<br>Flexibase |
|  | CCP W191G<br>binders      | 2011-10-05 | Not For Sale<br>(Model System) | 43      | 56      | 0     | 3     | Overview<br>Basic<br>Targets<br>Focus | SMILES<br>SDF<br>MOL2<br>Flexibase |
|  | CCP W191G non-<br>binders | 2011-10-05 | Not For Sale<br>(Model System) | 17      | 24      | 0     | 1     | Overview<br>Basic<br>Targets<br>Focus | SMILES<br>SDF<br>MOL2<br>Flexibase |
|  | ChEBI                     | 2012-01-26 | Not for Sale<br>(Annotated)    | 16563   | 11596   | 2072  | 888   | Overview<br>Basic<br>Targets<br>Focus | SMILES<br>SDF<br>MOL2<br>Flexibase |
|  | ChEMBL<br>DrugStore       | 2011-09-14 | Not for Sale<br>(Annotated)    | 1437    | 1508    | 96    | 69    | Overview<br>Basic<br>Targets<br>Focus | SMILES<br>SDF<br>MOL2<br>Flexibase |
|  | ChEMBL11                  | 2011-09-08 | Not for Sale<br>(Annotated)    | 1059560 | 1211557 |       | 75602 | Overview<br>Basic<br>Targets<br>Focus | SMILES<br>SDF<br>MOL2<br>Flexibase |

|                                                                                          |                                                                                   |                            |            |                          |         |         |       |       |                                       |                                    |
|------------------------------------------------------------------------------------------|-----------------------------------------------------------------------------------|----------------------------|------------|--------------------------|---------|---------|-------|-------|---------------------------------------|------------------------------------|
|  ChEMBL  |   | ChEMBL12                   | 2011-12-19 | Not for Sale (Annotated) | 1076486 | 1223663 | 62410 | 92843 | Overview<br>Basic<br>Targets<br>Focus | SMILES<br>SDF<br>MOL2<br>Flexibase |
|  ChEMBL |  | ChEMBL12 10uM              | 2011-12-29 | Not for Sale (Annotated) | 238073  | 274827  | 15604 | 27266 | Overview<br>Basic<br>Targets<br>Focus | SMILES<br>SDF<br>MOL2<br>Flexibase |
|  ChEMBL |  | ChEMBL13                   | 2011-08-30 | Not for Sale (Annotated) | 1000000 |         | 0     | 0     | Overview<br>Basic<br>Targets<br>Focus | SMILES<br>SDF<br>MOL2<br>Flexibase |
|         |                                                                                   | ChemBridge                 | 2012-01-02 | Items In Stock           | 801103  | 1111884 | 8991  | 68213 | Overview<br>Basic<br>Targets<br>Focus | SMILES<br>SDF<br>MOL2<br>Flexibase |
|         |                                                                                   | ChemBridge Building Blocks | 2012-03-02 | Items In Stock           | 13741   | 16523   | 237   | 128   | Overview<br>Basic<br>Targets<br>Focus | SMILES<br>SDF<br>MOL2<br>Flexibase |
|         |                                                                                   | ChemDiv                    | 2011-09-02 | Items In Stock           | 673640  | 843113  | 40974 | 1206  | Overview<br>Basic<br>Targets<br>Focus | SMILES<br>SDF<br>MOL2<br>Flexibase |
|       |                                                                                   | ChemDiv Building Blocks    | 2011-11-16 | Items In Stock           | 50104   | 59264   | 739   | 9453  | Overview<br>Basic<br>Targets<br>Focus | SMILES<br>SDF<br>MOL2<br>Flexibase |
|       |                                                                                   | ChemFuture PharmTech       | 2011-10-27 | Items In Stock           | 1324    | 1349    | 80    | 91    | Overview<br>Basic<br>Targets<br>Focus | SMILES<br>SDF<br>MOL2<br>Flexibase |
|       |                                                                                   | Chemical Block             | 2011-08-25 | Items In Stock           | 125754  | 181020  | 9867  | 8654  | Overview<br>Basic<br>Targets<br>Focus | SMILES<br>SDF<br>MOL2<br>Flexibase |
|       |                                                                                   | Chemical Block BB          | 2011-08-22 | Items In Stock           | 5564    | 6763    | 115   | 9     | Overview<br>Basic<br>Targets<br>Focus | SMILES<br>SDF<br>MOL2<br>Flexibase |
|       |                                                                                   | Chemik                     | 2011-08-23 | Items In Stock           | 3962    | 3675    | 290   | 47    | Overview<br>Basic<br>Targets<br>Focus | SMILES<br>SDF<br>MOL2<br>Flexibase |
|       |                                                                                   | Chemivate                  | 2011-08-23 | Items In Stock           | 1108    | 1456    | 3     | 0     | Overview<br>Basic<br>Targets<br>Focus | SMILES<br>SDF<br>MOL2<br>Flexibase |
|       |                                                                                   | ChemMol                    | 2011-12-04 | Agent                    | 82462   | 57568   | 5586  | 0867  | Overview<br>Basic<br>Targets<br>Focus | SMILES<br>SDF<br>MOL2<br>Flexibase |

|                                                                                     |                              |            |                          |         |         |        |        |                              |                           |
|-------------------------------------------------------------------------------------|------------------------------|------------|--------------------------|---------|---------|--------|--------|------------------------------|---------------------------|
|      | Chemical                     | 2011-12-04 | Agent                    | 32492   | 37300   | 3300   | 3007   | Targets Focus                | MOL2 Flexibase            |
|    | Chemonaut                    | 2012-02-23 | Agent                    | 4202600 | 4684344 | 153160 | 338869 | Overview Basic Targets Focus | SMILES SDF MOL2 Flexibase |
|    | CiVentiChem                  | 2011-12-13 | Items In Stock           | 2462    | 2646    | 99     | 1108   | Overview Basic Targets Focus | SMILES SDF MOL2 Flexibase |
|    | CNH Technologies             | 2009.10    | Items In Stock           | 244     | 217     | 18     | 32     | Overview Basic Targets Focus | SMILES SDF MOL2 Flexibase |
|    | Collaborative Drug Discovery | 2011-11-17 | Not for Sale (Annotated) | 1261617 | 1536878 | 31915  | 43687  | Overview Basic Targets Focus | SMILES SDF MOL2 Flexibase |
|    | Combi-Blocks                 | 2011-12-06 | Items In Stock           | 3320    | 1586    | 1564   | 7      | Overview Basic Targets Focus | SMILES SDF MOL2 Flexibase |
|   | CombiUgi                     | 2009.11    | Boutique                 | 117450  | 106087  |        | 106074 | Overview Basic Targets Focus | SMILES SDF MOL2 Flexibase |
|  | DiPeptides (Hao)             | 2011-12-20 | Collaborations Only      | 5922    | 2911    | 0      | 239    | Overview Basic Targets Focus | SMILES SDF MOL2 Flexibase |
|  | DrugBank-approved            | 2012-01-26 | Not for Sale (Annotated) | 1408    | 1761    | 85     | 92     | Overview Basic Targets Focus | SMILES SDF MOL2 Flexibase |
|  | DrugBank-experimental        | 2012-01-26 | Not for Sale (Annotated) | 5046    | 10253   | 897    | 738    | Overview Basic Targets Focus | SMILES SDF MOL2 Flexibase |
|  | DrugBank-nutraceuticals      | 2012-01-26 | Not for Sale (Annotated) | 75      | 115     | 3      | 4      | Overview Basic Targets Focus | SMILES SDF MOL2 Flexibase |
|  | DrugBank-Street Drugs        | 2012-01-26 | Not for Sale (Annotated) | 172     | 279     | 0      | 43     | Overview Basic Targets Focus | SMILES SDF MOL2 Flexibase |
|                                                                                     |                              |            |                          |         |         |        |        | Overview                     | SMILES                    |



|                                                                                     |                                 |            |                          |          |         |        |         |                                 |                                    |
|-------------------------------------------------------------------------------------|---------------------------------|------------|--------------------------|----------|---------|--------|---------|---------------------------------|------------------------------------|
|     | DrugBank-withdrawn              | 2012-01-26 | Not for Sale (Annotated) | 66       | 88      | 3      | 4       | Basic Targets Focus             | SDF<br>MOL2<br>Flexibase           |
|    | eMolecules                      | 2012-01-25 | Agent                    | 4632369  | 5639322 | 144517 | 55968   | Overview<br>Basic Targets Focus | SMILES<br>SDF<br>MOL2<br>Flexibase |
|    | Enamine                         | 2012-02-23 | Items In Stock           | 1485558  | 2016185 | 2192   | 90230   | Overview<br>Basic Targets Focus | SMILES<br>SDF<br>MOL2<br>Flexibase |
|    | Enamine BB Make on Demand       | 2011-12-05 | Boutique                 | 467397   | 630398  | 836    | 470429  | Overview<br>Basic Targets Focus | SMILES<br>SDF<br>MOL2<br>Flexibase |
|    | Enamine Building Blocks         | 2012-02-06 | Items In Stock           | 55640    | 65718   | 1403   | 3730    | Overview<br>Basic Targets Focus | SMILES<br>SDF<br>MOL2<br>Flexibase |
|    | Enamine-REAL                    | 2012-01-18 | Made On Demand           | 15188791 | 7438306 | 11376  | 6456152 | Overview<br>Basic Targets Focus | SMILES<br>SDF<br>MOL2<br>Flexibase |
|   | EndoTherm                       | 2012-01-20 | Items In Stock           | 2230     | 2274    | 248    | 774     | Overview<br>Basic Targets Focus | SMILES<br>SDF<br>MOL2<br>Flexibase |
|  | Enolase EN-EFI                  | 2011-10-25 | Collaborations Only      | 4358     | 87      | 0      | 6       | Overview<br>Basic Targets Focus | SMILES<br>SDF<br>MOL2<br>Flexibase |
|  | Enolase via KEGG (EFI)          | 2011-12-21 | Collaborations Only      | 8973     | 6351    | 34     | 409     | Overview<br>Basic Targets Focus | SMILES<br>SDF<br>MOL2<br>Flexibase |
|  | Enzo Life Sciences              | 2010.2     | Items In Stock           | 1172     | 1295    | 253    | 376     | Overview<br>Basic Targets Focus | SMILES<br>SDF<br>MOL2<br>Flexibase |
|  | Euroasia                        | 2009.10    | Items In Stock           | 85       | 73      | 14     | 25      | Overview<br>Basic Targets Focus | SMILES<br>SDF<br>MOL2<br>Flexibase |
|  | EvoBlocks                       | 2012-02-23 | Items In Stock           | 8367     | 10455   | 198    | 788     | Overview<br>Basic Targets Focus | SMILES<br>SDF<br>MOL2<br>Flexibase |
|  | FDA-approved drugs (via DSSTOX) | 2005-03-01 | Not for Sale (Annotated) | 1217     | 3180    | 28     | 507     | Overview<br>Basic Targets Focus | SMILES<br>SDF<br>MOL2<br>Flexibase |

|                                                                                     |                                  |            |                          |        |        |       |      |                                       |                                    |
|-------------------------------------------------------------------------------------|----------------------------------|------------|--------------------------|--------|--------|-------|------|---------------------------------------|------------------------------------|
|    | FineTech                         | 2011-07-27 | Items In Stock           | 4909   | 4735   | 510   | 132  | Overview<br>Basic<br>Targets<br>Focus | SMILES<br>SDF<br>MOL2<br>Flexibase |
|    | Florida Heterocyclic Compounds   | 2011-09-15 | Items In Stock           | 32056  | 41192  | 3467  | 2696 | Overview<br>Basic<br>Targets<br>Focus | SMILES<br>SDF<br>MOL2<br>Flexibase |
|    | Fluorochem                       | 2012-02-08 | Items In Stock           | 58004  | 58993  | 3391  | 1292 | Overview<br>Basic<br>Targets<br>Focus | SMILES<br>SDF<br>MOL2<br>Flexibase |
|    | Focus Synthesis                  | 2011-08-23 | Items In Stock           | 2339   | 2284   | 289   | 624  | Overview<br>Basic<br>Targets<br>Focus | SMILES<br>SDF<br>MOL2<br>Flexibase |
|    | Fragmenta                        | 2012-03-02 | Items In Stock           | 1699   | 2011   | 79    | 821  | Overview<br>Basic<br>Targets<br>Focus | SMILES<br>SDF<br>MOL2<br>Flexibase |
|   | Frinton                          | 2011-12-06 | Items In Stock           | 1187   | 1313   | 124   | 32   | Overview<br>Basic<br>Targets<br>Focus | SMILES<br>SDF<br>MOL2<br>Flexibase |
|  | Frontier                         | 2012-01-18 | Items In Stock           | 65119  | 75889  | 2173  | 4839 | Overview<br>Basic<br>Targets<br>Focus | SMILES<br>SDF<br>MOL2<br>Flexibase |
|  | Frontier Scientific BB           | 2012-01-18 | Items In Stock           | 18025  | 17112  | 2166  | 675  | Overview<br>Basic<br>Targets<br>Focus | SMILES<br>SDF<br>MOL2<br>Flexibase |
|  | Glutathione Transferrase GST-EFI | 2011-11-22 | Collaborations Only      | 39     | 52     | 3     | 5    | Overview<br>Basic<br>Targets<br>Focus | SMILES<br>SDF<br>MOL2<br>Flexibase |
|  | Haloacid dehalogenase HAD-EFI    | 2011-10-25 | Collaborations Only      | 108    | 111    | 7     | 12   | Overview<br>Basic<br>Targets<br>Focus | SMILES<br>SDF<br>MOL2<br>Flexibase |
|  | Human Metabolome Database        | 2011-08-23 | Not for Sale (Annotated) | 7886   | 4467   | 4280  | 333  | Overview<br>Basic<br>Targets<br>Focus | SMILES<br>SDF<br>MOL2<br>Flexibase |
|  | IBScreen                         | 2011-12-05 | Items In Stock           | 439481 | 598713 | 16543 | 595  | Overview<br>Basic<br>Targets<br>Focus | SMILES<br>SDF<br>MOL2<br>Flexibase |

|                                                                                     |                               |            |                |        |        |        |        |                                       |                                    |
|-------------------------------------------------------------------------------------|-------------------------------|------------|----------------|--------|--------|--------|--------|---------------------------------------|------------------------------------|
|    | IBScreen Bioactives           | 2012-01-27 | Items In Stock | 754    | 945    | 31     | 69     | Overview<br>Basic<br>Targets<br>Focus | SMILES<br>SDF<br>MOL2<br>Flexibase |
|    | IBScreen BuildingBlocks       | 2011-11-29 | Items In Stock | 10723  | 12559  | 363    | 96     | Overview<br>Basic<br>Targets<br>Focus | SMILES<br>SDF<br>MOL2<br>Flexibase |
|    | IBScreen NP                   | 2011-11-29 | Items In Stock | 46940  | 69363  | 741    | 596    | Overview<br>Basic<br>Targets<br>Focus | SMILES<br>SDF<br>MOL2<br>Flexibase |
|    | Indofine                      | 2012-02-02 | Items In Stock | 1593   | 1826   | 168    | 259    | Overview<br>Basic<br>Targets<br>Focus | SMILES<br>SDF<br>MOL2<br>Flexibase |
|    | Indofine Natural Products     | 2012-02-02 | Items In Stock | 56     | 113    | 3      | 28     | Overview<br>Basic<br>Targets<br>Focus | SMILES<br>SDF<br>MOL2<br>Flexibase |
|   | InFarmatik                    | 2010.5     | Items In Stock | 212    | 299    | 0      | 249    | Overview<br>Basic<br>Targets<br>Focus | SMILES<br>SDF<br>MOL2<br>Flexibase |
|  | InFarmatik (make-on-demand)   | 2011-11-16 | Boutique       | 8422   | 21016  | 50     | 20773  | Overview<br>Basic<br>Targets<br>Focus | SMILES<br>SDF<br>MOL2<br>Flexibase |
|  | Infospectrum                  | 2011-08-23 | Items In Stock | 2032   | 2003   | 254    | 207    | Overview<br>Basic<br>Targets<br>Focus | SMILES<br>SDF<br>MOL2<br>Flexibase |
|  | Innovapharm                   | 2011-11-28 | Boutique       | 316315 | 392259 | 51737  | 1674   | Overview<br>Basic<br>Targets<br>Focus | SMILES<br>SDF<br>MOL2<br>Flexibase |
|  | Innovapharm BB Make on Demand | 2011-11-16 | Boutique       | 64423  | 82616  | 1313   | 18575  | Overview<br>Basic<br>Targets<br>Focus | SMILES<br>SDF<br>MOL2<br>Flexibase |
|  | Innovapharm Building Blocks   | 2011-11-16 | Boutique       | 17519  | 22597  | 391    | 226    | Overview<br>Basic<br>Targets<br>Focus | SMILES<br>SDF<br>MOL2<br>Flexibase |
|  | Innovapharm Make-on-Demand    | 2011-11-16 | Boutique       | 230897 | 766734 | 180951 | 512873 | Overview<br>Basic<br>Targets<br>Focus | SMILES<br>SDF<br>MOL2<br>Flexibase |

|                                                                                     |                                  |            |                                |       |       |      |      |                                       |                                    |
|-------------------------------------------------------------------------------------|----------------------------------|------------|--------------------------------|-------|-------|------|------|---------------------------------------|------------------------------------|
|    | IS Chem Tech<br>(Make on Demand) | 2011-11-16 | Made On<br>Demand              | 304   | 351   | 21   | 0    | Overview<br>Basic<br>Targets<br>Focus | SMILES<br>SDF<br>MOL2<br>Flexibase |
|    | IS Chem. Tech<br>Building Blocks | 2011-09-14 | Items In Stock                 | 3646  | 3776  | 487  | 0    | Overview<br>Basic<br>Targets<br>Focus | SMILES<br>SDF<br>MOL2<br>Flexibase |
|    | IS Chemical<br>Technology        | 2011-09-14 | Items In Stock                 | 44063 | 40572 | 4038 | 3851 | Overview<br>Basic<br>Targets<br>Focus | SMILES<br>SDF<br>MOL2<br>Flexibase |
|    | Isoprenoid<br>synthase IS-EFI    | 2011-11-30 | Collaborations<br>Only         | 13    | 14    | 1    | 11   | Overview<br>Basic<br>Targets<br>Focus | SMILES<br>SDF<br>MOL2<br>Flexibase |
|    | IUPHAR Database                  | 2011-07-27 | Not for Sale<br>(Annotated)    | 1967  | 2276  | 203  | 256  | Overview<br>Basic<br>Targets<br>Focus | SMILES<br>SDF<br>MOL2<br>Flexibase |
|    | KEGG via<br>PubChem              | 2011-11-28 | Not for Sale<br>(Annotated)    | 19960 | 19851 | 2242 | 1666 | Overview<br>Basic<br>Targets<br>Focus | SMILES<br>SDF<br>MOL2<br>Flexibase |
|   | Key Organics<br>Building Blocks  | 2012-03-05 | Items In Stock                 | 7574  | 8873  | 44   | 105  | Overview<br>Basic<br>Targets<br>Focus | SMILES<br>SDF<br>MOL2<br>Flexibase |
|  | KeyOrganics                      | 2012-03-05 | Items In Stock                 | 53955 | 67384 | 1191 | 1316 | Overview<br>Basic<br>Targets<br>Focus | SMILES<br>SDF<br>MOL2<br>Flexibase |
|  | KeyOrganics<br>Bioactives        | 2012-03-05 | Items In Stock                 | 640   | 679   | 90   | 51   | Overview<br>Basic<br>Targets<br>Focus | SMILES<br>SDF<br>MOL2<br>Flexibase |
|  | L99A binders                     | 2011-10-05 | Not For Sale<br>(Model System) | 74    | 71    | 43   | 2    | Overview<br>Basic<br>Targets<br>Focus | SMILES<br>SDF<br>MOL2<br>Flexibase |
|  | L99A non-binders                 | 2011-10-05 | Not For Sale<br>(Model System) | 68    | 64    | 0    | 2    | Overview<br>Basic<br>Targets<br>Focus | SMILES<br>SDF<br>MOL2<br>Flexibase |
|  | L99A/M102Q<br>binders            | 2011-10-05 | Not For Sale<br>(Model System) | 94    | 101   | 0    | 3    | Overview<br>Basic<br>Targets<br>Focus | SMILES<br>SDF<br>MOL2<br>Flexibase |
|  | L99A/M102Q non-<br>binders       | 2011-10-05 | Not For Sale<br>(Model System) | 24    | 26    | 0    | 0    | Overview<br>Basic<br>Targets          | SMILES<br>SDF<br>MOL2              |

|     |                                |            |                |        |        |       |        |                                       | Focus                              | Flexibase |
|-------------------------------------------------------------------------------------|--------------------------------|------------|----------------|--------|--------|-------|--------|---------------------------------------|------------------------------------|-----------|
|    | Labotest                       | 2011-09-06 | Items In Stock | 106756 | 124842 | 9332  | 4308   | Overview<br>Basic<br>Targets<br>Focus | SMILES<br>SDF<br>MOL2<br>Flexibase |           |
|    | Labotest Building Blocks       | 2011-08-25 | Items In Stock | 3165   | 3412   | 297   | 3      | Overview<br>Basic<br>Targets<br>Focus | SMILES<br>SDF<br>MOL2<br>Flexibase |           |
|    | Letopharm                      | 2011-01-14 | Items In Stock | 26534  | 26509  | 2462  | 895    | Overview<br>Basic<br>Targets<br>Focus | SMILES<br>SDF<br>MOL2<br>Flexibase |           |
|    | Life Chemicals                 | 2011-12-04 | Items In Stock | 344693 | 414730 | 5751  | 9055   | Overview<br>Basic<br>Targets<br>Focus | SMILES<br>SDF<br>MOL2<br>Flexibase |           |
|    | Life Chemicals (Virtual)       | 2011-11-16 | Made On Demand | 408701 | 459378 | 30338 | 112538 | Overview<br>Basic<br>Targets<br>Focus | SMILES<br>SDF<br>MOL2<br>Flexibase |           |
|   | Life Chemicals Building Blocks | 2011-11-22 | Items In Stock | 26270  | 31091  | 31    | 392    | Overview<br>Basic<br>Targets<br>Focus | SMILES<br>SDF<br>MOL2<br>Flexibase |           |
|  | Matrix Scientific              | 2011-09-06 | Items In Stock | 55377  | 64855  | 2223  | 946    | Overview<br>Basic<br>Targets<br>Focus | SMILES<br>SDF<br>MOL2<br>Flexibase |           |
|  | Maybridge                      | 2011-12-19 | Items In Stock | 55810  | 70821  | 1560  | 2288   | Overview<br>Basic<br>Targets<br>Focus | SMILES<br>SDF<br>MOL2<br>Flexibase |           |
|  | Maybridge Building Blocks      | 2011-12-16 | Items In Stock | 6048   | 6216   | 473   | 37     | Overview<br>Basic<br>Targets<br>Focus | SMILES<br>SDF<br>MOL2<br>Flexibase |           |
|  | Maybridge Hit Finder           | 2011-03-10 | Items In Stock | 14400  | 19584  | 217   | 1206   | Overview<br>Basic<br>Targets<br>Focus | SMILES<br>SDF<br>MOL2<br>Flexibase |           |
|  | MicroCombiChem                 | 2011-11-22 | Items In Stock | 770    | 906    | 29    | 797    | Overview<br>Basic<br>Targets<br>Focus | SMILES<br>SDF<br>MOL2<br>Flexibase |           |
|  | MicroCombiChem BB              | 2011-11-22 | Items In Stock | 841    | 1014   | 35    | 715    | Overview<br>Basic<br>Targets<br>Focus | SMILES<br>SDF<br>MOL2<br>Flexibase |           |

|                                                                                     |                                                         |            |                             |         |         |        |        |                                       |                                    |
|-------------------------------------------------------------------------------------|---------------------------------------------------------|------------|-----------------------------|---------|---------|--------|--------|---------------------------------------|------------------------------------|
|    | MicroCombiChem<br>BB Make-on-demand                     | 2011-11-22 | Made On Demand              | 607     | 716     | 0      | 524    | Overview<br>Basic<br>Targets<br>Focus | SMILES<br>SDF<br>MOL2<br>Flexibase |
|    | MicroCombiChem<br>Make-on-demand                        | 2011-11-22 | Made On Demand              | 47      | 14      | 33     | 14     | Overview<br>Basic<br>Targets<br>Focus | SMILES<br>SDF<br>MOL2<br>Flexibase |
|    | MicroSource                                             | 2004-10    | Items In Stock              | 2117    | 3879    | 102    | 648    | Overview<br>Basic<br>Targets<br>Focus | SMILES<br>SDF<br>MOL2<br>Flexibase |
|    | mlsmr2                                                  | 2011-04-13 | Not for Sale<br>(Annotated) | 237280  | 292273  | 6758   | 47761  | Overview<br>Basic<br>Targets<br>Focus | SMILES<br>SDF<br>MOL2<br>Flexibase |
|    | mlsmr3 AMPC<br>Oliv                                     | 2011-04-13 | Not for Sale<br>(Annotated) | 517196  | 537314  | 17713  | 92235  | Overview<br>Basic<br>Targets<br>Focus | SMILES<br>SDF<br>MOL2<br>Flexibase |
|    | MLSMR4 May2011                                          | 2011-04-27 | Not for Sale<br>(Annotated) | 366867  | 473598  |        | 14599  | Overview<br>Basic<br>Targets<br>Focus | SMILES<br>SDF<br>MOL2<br>Flexibase |
|  | Molcan                                                  | 2011-09-12 | Items In Stock              | 1240    | 1332    | 62     | 486    | Overview<br>Basic<br>Targets<br>Focus | SMILES<br>SDF<br>MOL2<br>Flexibase |
|  | Molecular<br>Diversity<br>Preservation<br>International | 2011-12-05 | Items In Stock              | 22181   | 26918   | 743    | 11024  | Overview<br>Basic<br>Targets<br>Focus | SMILES<br>SDF<br>MOL2<br>Flexibase |
|  | Molport                                                 | 2012-02-08 | Agent                       | 4421283 | 5554673 | 148649 | 675996 | Overview<br>Basic<br>Targets<br>Focus | SMILES<br>SDF<br>MOL2<br>Flexibase |
|  | MP Biomedicals                                          | 2009.10    | Items In Stock              | 19769   | 18066   | 5412   | 3007   | Overview<br>Basic<br>Targets<br>Focus | SMILES<br>SDF<br>MOL2<br>Flexibase |
|  | Nagase                                                  | 2011-11-02 | Items In Stock              | 78      | 79      | 2      | 26     | Overview<br>Basic<br>Targets<br>Focus | SMILES<br>SDF<br>MOL2<br>Flexibase |
|  | NCI Diversity II                                        | 2009.4     | Not for Sale<br>(Annotated) | 1364    | 1880    | 5      | 342    | Overview<br>Basic<br>Targets<br>Focus | SMILES<br>SDF<br>MOL2<br>Flexibase |
|  | NCI Plated 2007                                         | 2011-09-21 | Items In Stock              | 139735  | 87374   | 21235  | 59580  | Overview<br>Basic<br>Targets          | SMILES<br>SDF<br>MOL2              |

|     |                                       |            |                     |         |         |       |        |                                       | Focus                              | Flexibase |
|-------------------------------------------------------------------------------------|---------------------------------------|------------|---------------------|---------|---------|-------|--------|---------------------------------------|------------------------------------|-----------|
|    | Oakwood Chemical                      | 2011-09-20 | Items In Stock      | 43273   | 46166   | 2317  | 2356   | Overview<br>Basic<br>Targets<br>Focus | SMILES<br>SDF<br>MOL2<br>Flexibase |           |
|    | Otava                                 | 2011-12-13 | Items In Stock      | 157744  | 197185  | 8853  | 1236   | Overview<br>Basic<br>Targets<br>Focus | SMILES<br>SDF<br>MOL2<br>Flexibase |           |
|    | Otava (Virtual)                       | 2011-11-16 | Boutique            | 339583  | 443391  | 11396 | 372762 | Overview<br>Basic<br>Targets<br>Focus | SMILES<br>SDF<br>MOL2<br>Flexibase |           |
|    | Otava BB Make-to-order                | 2012-01-05 | Boutique            | 1681032 | 1765749 | 9082  | 994967 | Overview<br>Basic<br>Targets<br>Focus | SMILES<br>SDF<br>MOL2<br>Flexibase |           |
|    | PBMR Labs                             | 2010.4     | Items In Stock      | 379034  | 482755  | 20572 | 63554  | Overview<br>Basic<br>Targets<br>Focus | SMILES<br>SDF<br>MOL2<br>Flexibase |           |
|   | Peakdale                              | 2011-12-06 | Items In Stock      | 15339   | 17066   | 330   | 15117  | Overview<br>Basic<br>Targets<br>Focus | SMILES<br>SDF<br>MOL2<br>Flexibase |           |
|  | PepTech                               | 2011-12-16 | Items In Stock      | 2380    | 1692    | 771   | 552    | Overview<br>Basic<br>Targets<br>Focus | SMILES<br>SDF<br>MOL2<br>Flexibase |           |
|  | Pharmeks                              | 2011-12-29 | Items In Stock      | 259523  | 379166  | 24183 | 28810  | Overview<br>Basic<br>Targets<br>Focus | SMILES<br>SDF<br>MOL2<br>Flexibase |           |
|  | Phosphate sugars (EFI)                | 2011-12-20 | Collaborations Only | 199     | 86      | 0     | 9      | Overview<br>Basic<br>Targets<br>Focus | SMILES<br>SDF<br>MOL2<br>Flexibase |           |
|  | Prestwick Chemical                    | 2011-07-26 | Items In Stock      | 1200    | 1968    | 124   | 177    | Overview<br>Basic<br>Targets<br>Focus | SMILES<br>SDF<br>MOL2<br>Flexibase |           |
|  | Princeton BioMolecular BuildingBlocks | 2011-05-17 | Boutique            | 70252   | 82853   | 1221  | 22071  | Overview<br>Basic<br>Targets<br>Focus | SMILES<br>SDF<br>MOL2<br>Flexibase |           |
|  | Princeton BioMolecular Research       | 2011-05-26 | Items In Stock      | 910414  | 1084177 | 54683 | 54403  | Overview<br>Basic<br>Targets<br>Focus | SMILES<br>SDF<br>MOL2<br>Flexibase |           |

|                                                                                     |                                         |            |                             |          |          |         |         |                                       |                                    |
|-------------------------------------------------------------------------------------|-----------------------------------------|------------|-----------------------------|----------|----------|---------|---------|---------------------------------------|------------------------------------|
|     | Princeton NP                            | 2011-12-06 | Items In Stock              | 45785    | 49381    | 43      | 2543    | Overview<br>Basic<br>Targets<br>Focus | SMILES<br>SDF<br>MOL2<br>Flexibase |
|    | PubChem                                 | 2011-05-17 | Not for Sale<br>(Annotated) | 31453252 | 15467019 | 3193633 | 5367313 | Overview<br>Basic<br>Targets<br>Focus | SMILES<br>SDF<br>MOL2<br>Flexibase |
|    | Ryan Scientific                         | 2006.5     | Agent                       | 185372   | 120266   | 6527    | 200     | Overview<br>Basic<br>Targets<br>Focus | SMILES<br>SDF<br>MOL2<br>Flexibase |
|    | Ryan Scientific BB                      | 2012-02-15 | Items In Stock              | 145634   | 119719   | 6300    | 1080    | Overview<br>Basic<br>Targets<br>Focus | SMILES<br>SDF<br>MOL2<br>Flexibase |
|    | Scientific Exchange                     | 2011-03-09 | Agent                       | 47455    | 58907    | 15043   | 7389    | Overview<br>Basic<br>Targets<br>Focus | SMILES<br>SDF<br>MOL2<br>Flexibase |
|   | Scientific Exchange<br>(make on demand) | 2011-11-16 | Agent                       | 1161526  | 1293626  | 24497   | 438426  | Overview<br>Basic<br>Targets<br>Focus | SMILES<br>SDF<br>MOL2<br>Flexibase |
|  | Scientific Exchange<br>Building Blocks  | 2011-02-16 | Agent                       | 25504    | 33568    | 190     | 8930    | Overview<br>Basic<br>Targets<br>Focus | SMILES<br>SDF<br>MOL2<br>Flexibase |
|  | Selleck<br>BioChemicals                 | 2011-11-28 | Items In Stock              | 563      | 614      | 35      | 0       | Overview<br>Basic<br>Targets<br>Focus | SMILES<br>SDF<br>MOL2<br>Flexibase |
|  | Selleck<br>BioChemicals NP              | 2011-11-29 | Items In Stock              | 130      | 136      | 17      | 0       | Overview<br>Basic<br>Targets<br>Focus | SMILES<br>SDF<br>MOL2<br>Flexibase |
|  | Selleck Chemicals                       | 2011-11-18 | Items In Stock              | 1089     | 1134     | 74      | 263     | Overview<br>Basic<br>Targets<br>Focus | SMILES<br>SDF<br>MOL2<br>Flexibase |
|  | Sequoia Research<br>Products            | 2011-10-05 | Items In Stock              | 2266     | 2407     | 384     | 100     | Overview<br>Basic<br>Targets<br>Focus | SMILES<br>SDF<br>MOL2<br>Flexibase |
|  | Shanghai<br>SinoFluoro<br>Scientific    | 2012-02-24 | Items In Stock              | 1535     | 1353     | 137     | 53      | Overview<br>Basic<br>Targets<br>Focus | SMILES<br>SDF<br>MOL2<br>Flexibase |



|                                                                                     |                                    |            |                             |        |        |       |       |                                       |                                    |
|-------------------------------------------------------------------------------------|------------------------------------|------------|-----------------------------|--------|--------|-------|-------|---------------------------------------|------------------------------------|
|    | Sigma Aldrich<br>(Building Blocks) | 2012-01-20 | Items In Stock              | 77614  | 37659  | 19217 | 5306  | Overview<br>Basic<br>Targets<br>Focus | SMILES<br>SDF<br>MOL2<br>Flexibase |
|    | Sinova                             | 2008.6     | Items In Stock              | 3335   | 3074   | 122   | 1828  | Overview<br>Basic<br>Targets<br>Focus | SMILES<br>SDF<br>MOL2<br>Flexibase |
|    | SMDC CDiv<br>Carboxamide           | 2012-02-20 | Not for Sale<br>(Annotated) | 4417   | 5516   | 205   | 132   | Overview<br>Basic<br>Targets<br>Focus | SMILES<br>SDF<br>MOL2<br>Flexibase |
|    | SMDC CDiv<br>Diverse               | 2012-02-21 | Not for Sale<br>(Annotated) | 50000  | 69194  | 33    | 1334  | Overview<br>Basic<br>Targets<br>Focus | SMILES<br>SDF<br>MOL2<br>Flexibase |
|    | SMDC CDiv Kinase                   | 2012-02-20 | Not for Sale<br>(Annotated) | 10000  | 11581  | 2     | 531   | Overview<br>Basic<br>Targets<br>Focus | SMILES<br>SDF<br>MOL2<br>Flexibase |
|    | SMDC ChBr<br>Diverse               | 2012-02-20 | Not for Sale<br>(Annotated) | 23865  | 32099  | 124   | 2541  | Overview<br>Basic<br>Targets<br>Focus | SMILES<br>SDF<br>MOL2<br>Flexibase |
|  | SMDC ChBr<br>Premium               | 2012-02-20 | Not for Sale<br>(Annotated) | 30000  | 44774  | 3     | 3647  | Overview<br>Basic<br>Targets<br>Focus | SMILES<br>SDF<br>MOL2<br>Flexibase |
|  | SMDC Iconix                        | 2012-02-20 | Not for Sale<br>(Annotated) | 909    | 1065   | 45    | 25    | Overview<br>Basic<br>Targets<br>Focus | SMILES<br>SDF<br>MOL2<br>Flexibase |
|  | SMDC Life and<br>Maybridge         | 2012-02-20 | Not for Sale<br>(Annotated) | 2451   | 2756   | 5     | 9     | Overview<br>Basic<br>Targets<br>Focus | SMILES<br>SDF<br>MOL2<br>Flexibase |
|  | SMDC<br>MicroSource                | 2012-02-20 | Not for Sale<br>(Annotated) | 2160   | 3404   |       | 277   | Overview<br>Basic<br>Targets<br>Focus | SMILES<br>SDF<br>MOL2<br>Flexibase |
|  | Specs                              | 2011-12-13 | Items In Stock              | 203434 | 273915 | 15181 | 26461 | Overview<br>Basic<br>Targets<br>Focus | SMILES<br>SDF<br>MOL2<br>Flexibase |
|  | Specs Building<br>Blocks           | 2011-12-06 | Items In Stock              | 8523   | 9239   | 254   | 269   | Overview<br>Basic<br>Targets<br>Focus | SMILES<br>SDF<br>MOL2<br>Flexibase |
|  | Specs Natural                      |            |                             |        |        |       |       | Overview<br>Basic                     | SMILES<br>SDF                      |

|                                                                                                                            |                          |            |                     |        |        |       |      |                              |                           |
|----------------------------------------------------------------------------------------------------------------------------|--------------------------|------------|---------------------|--------|--------|-------|------|------------------------------|---------------------------|
| <br>chemistry solutions for drug discovery | Products                 | 2011-12-06 | Items In Stock      | 456    | 651    | 107   | 31   | Targets Focus                | MOL2 Flexibase            |
|                                           | spectrum                 | 2011-08-23 | Items In Stock      | 2320   | 4885   | 324   | 477  | Overview Basic Targets Focus | SMILES SDF MOL2 Flexibase |
|                                           | SynChem                  | 2007       | Items In Stock      | 937    | 1011   | 14    | 0    | Overview Basic Targets Focus | SMILES SDF MOL2 Flexibase |
|                                           | SYNHEM OHG               | 2008.6     | Items In Stock      | 2127   | 2003   | 214   | 744  | Overview Basic Targets Focus | SMILES SDF MOL2 Flexibase |
|                                           | Synergy Scientific BB    | 2012-01-09 | Items In Stock      | 4295   | 4323   | 142   | 0    | Overview Basic Targets Focus | SMILES SDF MOL2 Flexibase |
|                                           | SynQuest Laboratories    | 2007       | Items In Stock      | 3516   | 2218   | 1509  | 94   | Overview Basic Targets Focus | SMILES SDF MOL2 Flexibase |
|                                          | Synthon-Lab              | 2011-10-07 | Items In Stock      | 54436  | 81096  | 2645  | 2209 | Overview Basic Targets Focus | SMILES SDF MOL2 Flexibase |
|                                         | Synthonix                | 2007       | Items In Stock      | 1817   | 1505   | 341   | 425  | Overview Basic Targets Focus | SMILES SDF MOL2 Flexibase |
|                                         | TCI                      | 2012-03-01 | Items In Stock      | 20310  | 17320  | 2570  | 1110 | Overview Basic Targets Focus | SMILES SDF MOL2 Flexibase |
|                                         | TCM Database @ Taiwan    | 2011-11-16 | Collaborations Only | 15747  | 6595   | 2876  | 280  | Overview Basic Targets Focus | SMILES SDF MOL2 Flexibase |
|                                         | TimTec                   | 2011-12-19 | Items In Stock      | 205589 | 258020 | 13373 | 1410 | Overview Basic Targets Focus | SMILES SDF MOL2 Flexibase |
|                                         | TimTec BB Make on Demand | 2011-12-14 | Made On Demand      | 32334  | 39213  | 1271  | 55   | Overview Basic Targets Focus | SMILES SDF MOL2 Flexibase |
|                                         | TimTec Building Blocks   | 2011-12-16 | Items In Stock      | 35307  | 40779  | 1373  | 188  | Overview Basic Targets Focus | SMILES SDF MOL2 Flexibase |

|                                                                                     |                            |            |                          |        |        |       |      |                                    |                                    |
|-------------------------------------------------------------------------------------|----------------------------|------------|--------------------------|--------|--------|-------|------|------------------------------------|------------------------------------|
|    | TimTec Make-on-Demand      | 2012-01-09 | Made On Demand           | 678040 | 811436 | 22665 | 2821 | Overview<br>Basic Targets<br>Focus | SMILES<br>SDF<br>MOL2<br>Flexibase |
|    | TimTec Natural Derivatives | 2011-12-07 | Items In Stock           | 3040   | 4961   | 67    | 314  | Overview<br>Basic Targets<br>Focus | SMILES<br>SDF<br>MOL2<br>Flexibase |
|    | Tocris                     | 2005.10    | Items In Stock           | 974    | 1177   | 162   | 284  | Overview<br>Basic Targets<br>Focus | SMILES<br>SDF<br>MOL2<br>Flexibase |
|    | Toronto Research Chemicals | 2012-03-05 | Items In Stock           | 20083  | 25239  | 1713  | 8149 | Overview<br>Basic Targets<br>Focus | SMILES<br>SDF<br>MOL2<br>Flexibase |
|    | Toslab                     | 2011-12-07 | Items In Stock           | 22065  | 29502  | 4935  | 6315 | Overview<br>Basic Targets<br>Focus | SMILES<br>SDF<br>MOL2<br>Flexibase |
|   | Toslab Building Blocks     | 2011-12-06 | Items In Stock           | 1222   | 1647   | 94    | 533  | Overview<br>Basic Targets<br>Focus | SMILES<br>SDF<br>MOL2<br>Flexibase |
|  | Tractus                    | 2012-02-07 | Items In Stock           | 75547  | 78161  | 2421  | 3480 | Overview<br>Basic Targets<br>Focus | SMILES<br>SDF<br>MOL2<br>Flexibase |
|  | Trylead Chemical           | 2008.12    | Items In Stock           | 8242   | 7745   | 1168  | 12   | Overview<br>Basic Targets<br>Focus | SMILES<br>SDF<br>MOL2<br>Flexibase |
|  | Tyger                      | 2005.10    | Items In Stock           | 2670   | 3345   | 150   | 1381 | Overview<br>Basic Targets<br>Focus | SMILES<br>SDF<br>MOL2<br>Flexibase |
|  | Ubichem                    | 2008.11    | Items In Stock           | 1220   | 1230   | 87    | 380  | Overview<br>Basic Targets<br>Focus | SMILES<br>SDF<br>MOL2<br>Flexibase |
|  | UEFS Natural Products      | 2011-11-29 | Collaborations Only      | 503    | 473    | 7     | 382  | Overview<br>Basic Targets<br>Focus | SMILES<br>SDF<br>MOL2<br>Flexibase |
|  | UMBBD                      | 2011-12-05 | Not for Sale (Annotated) | 1319   | 1517   | 172   | 79   | Overview<br>Basic Targets<br>Focus | SMILES<br>SDF<br>MOL2<br>Flexibase |
|                                                                                     |                            |            |                          |        |        |       |      | Overview                           | SMILES                             |

|                                                                                   |                          |            |                |         |         |       |         |                                 |                                    |
|-----------------------------------------------------------------------------------|--------------------------|------------|----------------|---------|---------|-------|---------|---------------------------------|------------------------------------|
|   | UORSY                    | 2012-03-05 | Items In Stock | 1300403 | 1494307 | 16560 | 594215  | Basic Targets Focus             | SDF<br>MOL2<br>Flexibase           |
|  | UORSY BB Make-on-demand  | 2012-03-02 | Boutique       | 5996815 | 7803833 | 42983 | 6678245 | Overview<br>Basic Targets Focus | SMILES<br>SDF<br>MOL2<br>Flexibase |
|  | Vitas-M                  | 2012-01-02 | Items In Stock | 1101501 | 1352753 | 62523 | 11487   | Overview<br>Basic Targets Focus | SMILES<br>SDF<br>MOL2<br>Flexibase |
|  | Vitasm-M Building Blocks | 2011-12-13 | Items In Stock | 17968   | 19871   | 401   | 4       | Overview<br>Basic Targets Focus | SMILES<br>SDF<br>MOL2<br>Flexibase |
|  | Zannan                   | 2009.5     | Items In Stock | 1514    | 2893    | 73    | 2158    | Overview<br>Basic Targets Focus | SMILES<br>SDF<br>MOL2<br>Flexibase |

Bioinformatics and Chemical Informatics Research Center (BCIRC) [Terms of use](#) [Privacy policy](#) [Questions, Discussion, Bug reports, Feature requests](#) Thank you NIGMS! GM71896

# Filtering rules in effect at docking.org

For each set of filtering rules, we provide them in raw text and also in an graphic form. Thanks to Mattias Rarey and his group for [SMARTSviewer](#).

## Basic filters: applied to all vendor catalogs

- text: [rules\\_default.txt](#)
- graphic: [graphic version](#)

## Annotated catalog filters

Catalogs of biologically active molecules are filtered using more permissive rules (because they are active).

- text: [rules\\_annotated.txt](#)
- graphic: [graphic version](#)

## Secondary filters

Molecules are annotated as potentially problematic if they match any of these filters.

### yuck rules

The "clean" subsets in ZINC have any molecule matching any of these two yuck rule sets filtered out. Editorial comment: We do not endorse either set of yuck rules. They are provided merely as a convenience to users. Many perfectly good actives and over 1/2 of purchasable chemistry are filtered out by these rules. caveat emptor

- text: [rules\\_yuck.txt](#)
- graphic: [graphic version](#)

### yuck1 rules

A second set of rules.

- text: [rules\\_yuck1.txt](#)
- graphic: [graphic version](#)

## Blaster rules

During upload and DOCK Blaster, we are more tolerant of ligands since they bind (i.e. in the PDB). These are like the rules for

- text: [rules\\_blaster.txt](#)
- graphic: [graphic version](#)

Many thanks to David M. Lorber for the filtering script and our colleagues at drug companies for advice. As always at docking.org, the sole responsibility for any errors is John Irwin's.

Finally, a wide range of SMARTS definitions.

- text: [smarts\\_use.txt](#)
- graphic: [graphic version](#)

Last updated: October 2011.

```

#special flags
50.0 500.0 MOLWT
STRIPSALTS yes
0 10 CHIRALITY enumerate
ALLOWED_ATOMS C N O S P Cl F Br I H

# normal format is (min, max, name, SMARTS)

#rules
5 40 Non-Hydrogen_atoms [a,A]
2 40 carbons [#6]
0 20 N,O,S [#7,#8,#16]
0 1 Sulfonyl_halides S(=O)(=O)[Cl,Br]
0 1 Acid_halides [S,C](=[O,S])[F,Br,Cl,I]
0 1 Alkyl_halides [Br,Cl,I][CX4;CH,CH2]
0 0 Phosphenes cPc
0 0 Heptanes [CD1][CD2][CD2][CD2][CD2][CD2][CD2]
0 0 Perchlorates OCl(O)(O)(O)
0 7 Fluorines F
0 6 Cl,Br,I [Cl,Br,I]
0 0 Carbazides O=CN=[N+]=[N-]
0 0 Acid_anhydrides C(=O)OC(=O)
0 0 Peroxides OO
0 1 Iso(thio)cyanates N=C=[S,O]
0 1 Thiocyanates SC#N
0 0 Phosphoranes C=P
0 0 P/S_halides [P,S][Cl,Br,F,I]
#0 0 Carbodiimides N=C=N
0 0 Cyanohydrines N#CC[OH]
0 0 Carbazides O=CN=[N+]=[N-]
0 1 Sulfate_esters COS(=O)O[C,c]
0 1 Sulfonates COS(=O)(=O)[C,c]
0 0 Pentafluorophenyl_esters C(=O)Oc1c(F)c(F)c(F)c(F)c1(F)
0 0 Paranitrophenyl_esters C(=O)Oc1ccc(N(=O)=O)cc1
0 0 HOBT_esters C(=O)Onnn
0 0 Triflates OS(=O)(=O)C(F)(F)F
0 0 Lawesson's_reagents P(=S)(S)S
0 0 Phosphoramides NP(=O)(N)N
0 0 Aromatic_azides cN=[N+]=[N-]
0 2 Quaternary_C,Cl,I,P,S [C+,Cl+,I+,P+,S+]
0 2 Beta_carbonyl_quaternary_N C(=O)C[N+,n+]
0 2 Acylhydrazides [N;R0][N;R0]C(=O)
0 0 Chloramidines [Cl]C([C&R0])=N
0 0 Isonitriles [N+]#[C-]
0 0 Triacyloximes C(=O)N(C(=O))OC(=O)
0 0 Acyl_cyanides N#CC(=O)
0 0 Sulfonyl_cyanides S(=O)(=O)C#N
0 0 Cyanophosphonates P(OCC)(OCC)(=O)C#N
0 0 Azocyanamides [N;R0]=[N;R0]C#N
0 0 Azoalkanes [N;R0]=[N;R0]CC=O
0 2 (Thio)epoxides,aziridines Cl[O,S,N]Cl
0 2 Benzylic_quaternary_N cC[N+]
0 2 Thioesters C[O,S;R0][C;R0](=S)
0 3 Diand_Triphosphates P(=O)([OH])OP(=O)[OH]
0 2 Aminoxy(oxo) [#7]O[#6,#16]=O
0 2 nitros N(~[OD1])~[OD1]
0 2 Imines C=[N;R0]*
0 2 Acrylonitriles N#CC=C
0 2 Propenals C=CC(=O)[!#7;!#8]
0 1 Quaternary_N [nD1+,ND4+]

```





```
#special flags
50.0 600.0 MOLWT
STRIPSALTS yes
0 20 CHIRALITY enumerate
ALLOWED_ATOMS C N O S P Cl F Br I H

# normal format is (min, max, name, SMARTS)

#rules
4 50 Non-Hydrogen_atoms [a,A]
1 49 carbons [#6]
```

```

#special flags
80.0 999.0 MOLWT
STRIPSALTS yes
0 10 CHIRALITY
ALLOWED_ATOMS C N O S P Cl F Br I H

# normal format is (min, max, name, SMARTS)

#rules
0 0 Sulfonyl_halides S(=O)(=O)[Cl,Br]
0 0 Acid_halides [S,C](=[O,S])[F,Br,Cl,I]
0 0 Alkyl_halides [Br,Cl,I][CX4;CH,CH2]
0 0 Phosphenes cPc
0 0 Heptanes [CD1][CD2][CD2][CD2][CD2][CD2][CD2]
0 0 Perchlorates OCl(O)(O)(O)
0 7 Fluorines F
0 6 Cl,Br,I [Cl,Br,I]
0 0 Carbazides O=CN=[N+]=[N-]
0 0 Acid_anhydrides C(=O)OC(=O)
0 0 Peroxides OO
0 0 Iso(thio)cyanates N=C=[S,O]
0 0 Thiocyanates SC#N
0 0 Phosphoranes C=P
0 0 P/S_halides [P,S][Cl,Br,F,I]
0 0 Carbodiimides N=C=N
0 0 Cyanohydrines N#CC[OH]
0 0 Carbazides O=CN=[N+]=[N-]
0 0 Sulfate_esters COS(=O)O[C,c]
0 0 Sulfonates COS(=O)(=O)[C,c]
0 0 Pentafluorophenyl_esters C(=O)Oc1c(F)c(F)c(F)c(F)c1(F)
0 0 Paranitrophenyl_esters C(=O)Oc1ccc(N(=O)=O)cc1
0 0 HOBT_esters C(=O)Onnn
0 0 Triflates OS(=O)(=O)C(F)(F)F
0 0 Lawesson's_reagents P(=S)(S)S
0 0 Phosphoramides NP(=O)(N)N
0 0 Aromatic_azides cN=[N+]=[N-]
0 0 Quaternary_C,Cl,I,P,S [C+,Cl+,I+,P+,S+]
0 0 Beta_carbonyl_quaternary_N C(=O)C[N+,n+]
0 0 Acylhydrazides [N;R0][N;R0]C(=O)
0 0 Chloramidines [Cl]C([C&R0])=N
0 0 Isonitriles [N+]#[C-]
0 0 Triacyloximes C(=O)N(C(=O))OC(=O)
0 0 Acyl_cyanides N#CC(=O)
0 0 Sulfonyl_cyanides S(=O)(=O)C#N
0 0 Cyanophosphonates P(OCC)(OCC)(=O)C#N
0 0 Azocyanamides [N;R0]=[N;R0]C#N
0 0 Azoalkanes [N;R0]=[N;R0]CC=O
0 0 (Thio)epoxides,aziridines Cl[O,S,N]Cl
0 0 Benzylic_quaternary_N cC[N+]
0 0 Thioesters C[O,S;R0][C;R0](=S)
0 0 Diand_Triphosphates P(=O)([OH])OP(=O)[OH]
0 0 Aminoxy(oxo) [#7]O[#6,#16]=O
0 0 nitros N(~[OD1])~[OD1]
0 0 Imines C=[N;R0]*
0 0 Acrylonitriles N#CC=C
0 0 Propenals C=CC(=O)[!#7;!#8]
0 0 Quaternary_N [nD4+,ND4+]
0 0 azo [N;D2;$ (N=[N;D2]);!$(N(=N)~[#7,#8,#15,#16]);!$(N=N~[#7,#8,#15,#16])]
0 0 Azide N=[N+]=[N-]
0 0 epoxide ClCO1

```

```
0 0 chloroformate C(=O)Cl
0 0 benzylic_halide c[CD2X4][F,Cl,Br,I]
0 0 thioether CSC
0 0 thiol [SD1]
0 0 disulfide S-S
0 0 aldehyde [CD2](=O)
0 0 N_O_bonds N-O
0 0 N_N_bonds N-N
0 0 michael [$([CH1,CH2]=CC=O)]
```

```

#special flags
50.0 700.0 MOLWT
STRIPSALTS yes
#0 10 CHIRALITY enumerate
ALLOWED_ATOMS C N O S P Cl F Br I H

# normal format is (min, max, name, SMARTS)

#rules
0 0 rule2 *C(=S)[N,S]
0 0 rule3 *O[N+](=O)[O-]
0 0 rule4 *OCS(=O)(=O)O
0 0 rule5 *OS(=O)(=O)O
0 0 rule6 [#6;R3;!r7][#6;R3;!r7][#6;R3;!r7]1[#6;R3;!r7][#6;R3;!r7][#6;R3;!r7]**1
0 0 rule7 [#7,#8;r9,r10,r11,r12,r13,r14,r15,r16,r17,r18][#6;R][#6;R]
[#7,#8;r9,r10,r11,r12,r13,r14,r15,r16,r17,r18][#6;R][#6;R]
[#7,#8;r9,r10,r11,r12,r13,r14,r15,r16,r17,r18]
0 0 rule8 [$( [2H] ),$( [3H] )]
0 0 rule9 [$( [CH](C#N)([F,Cl,Br,I] ) ),$( [CH](C=O)([F,Cl,Br,I] ) ),$( [CH](N(=O)=O)
([F,Cl,Br,I] ) )]
0 0 rule10
[$([Np]),$([Ru]),$([Sr]),$([Rh]),$([Se]),$([Pd]),$([Sc]),$([Bi]),$([Ag]),$([Ti]),$([Al]),$([Cd]),$([V]),$([In]),$([Cr]),$([Sn]),$([Mn]),$([La]),$([Fe]),$([Er]),$([Tm]),$([Yb]),$([Lu]),$([Hf]),$([Ta]),$([W]),$([Re]),$([Co]),$([Os]),$([Ni]),$([Ir]),$([Cu]),$([Zn]),$([Ga]),$([Pu]),$([Ge]),$([Am]),$([As]),$([Cm]),$([Y]),$([Bk]),$([Zr]),$([Cf]),$([Nb]),$([Es]),$([Fm]),$([Ce]),$([No]),$([Pr]),$([Nd]),$([Pm]),$([Sm]),$([Eu]),$([Gd]),$([Tb]),$([Dy]),$([Ho]),$([Pt]),$([Au]),$([Hg]),$([Tl]),$([Pb]),$([Ac]),$([Th]),$([Pa]),$([Mo]),$([U]),$([Tc]),$([Te])]
0 0 rule11 [$(C(=O));H1][C;X4]
0 0 rule12 [$(C(=O)c);H1]
0 0 rule13 [$(C(=O)N);H1]
0 0 rule14 [*;H1]OC(=[O,S])[N,O,S]
0 0 rule15 [*][C;!R](=O)[C;!R](=O)[*]
0 0 rule16 [*][C;!R](=O)C[C;!R](=O)[*]
0 0 rule17 [*]1=[!N]-C(=O)-C(=O)-[!N]=[*]1
0 0 rule18 [B]
0 0 rule19 [C,c]C(=O)[F,Cl,Br,I,$(S(=O)(=O))]
0 0 rule20 [C,c]C(=O)C(=O)[C,c]
0 0 rule21 [C,c]C(=O)C[F,Cl,Br,I,$(S(=O)(=O))]
0 0 rule22 [C,c]OP(=O)(=O)C[C,c]
0 0 rule23 [C,c]OS(=O)(=O)C[C,c]
0 0 rule24 [C,c]OS(=O)O[C,c]
0 0 rule25 [C,S,P](=O)[OH].[C,S,P](=O)[OH].[C,S,P](=O)[OH].[C,S,P](=O)[OH]
0 0 rule26 [C;H2]=[C][N,O]
0 0 rule27 [C;X4;H2][C;R0](=O)[C;H3]
0 0 rule28 [C;X4;R0][C;X4;R0][C;R0](=[N;R0][C;X4;R0])[C;X4;R0]
0 0 rule29 [C;X4][O,N,S;D2;R0][O,N,S;D2;R0][CX4,H]
0 0 rule30 [C]=[C][Cl,Br,I,F]
0 0 rule31 [C+,Cl+,I+,P+,S+]
0 0 rule32 [CH2]=C-C=O
0 0 rule33 [Cl,Br,I,F]CC(=O)[O,N]
0 0 rule34 [Cl,Br,I].[Cl,Br,I].[Cl,Br,I].[Cl,Br,I].[Cl,Br,I].[Cl,Br,I]
0 0 rule35 [Cl,Br,I][CX4;CH,CH2]
0 0 rule36 [Cl,I]([*])[*]
0 0 rule37 [Cl][$(C(=O));!$(C(=O)N)]
0 0 rule38 [Cl]C([C&R0])=N
0 0 rule39 [F,Cl,Br,I,$(S(=O)(=O))]C([F,Cl,Br,I,$(S(=O)(=O)))([F,Cl,Br,I,$(S(=O)(=O))])C(=O)[C;X4;H2]
0 0 rule40 [F,Cl,Br,I,$(S(=O)(=O))]c1ncccn1
0 0 rule41 [F,Cl,Br,I][$( [C,S]=[O,S] );!$( [C,S]=[O,S] )N ]

```

```

0 0 rule42 [N&D2](=O)
0 0 rule43 [N,O,S]C#N
0 0 rule44 [N;D4]
0 0 rule45 [N;R0][N;R0]C(=O)
0 0 rule46 [N;R0]=[N;R0]C#N
0 0 rule47 [N;R0]=[N;R0]CC=O
0 0 rule48 [N+,n+][N-,n-]
0 0 rule49 [N+]#[C-]
0 0 rule50 [O;H1]c1cccc1[O;H1]
0 0 rule51 [O]=[N][C,N]
0 0 rule52 [P,S][Cl,Br,F,I]
0 0 rule53 [P]
0 0 rule54 [S;!R]C(=[S,O;!R])([!O;!S;!N])
0 0 rule55 [SH]
0 0 rule56 [Si]
0 0 rule57 C#N.C#N.C#N.C#N
0 0 rule58 c([OH])c([OH])c([OH])
0 0 rule59 c([OH])c([OH])cc([OH])
0 0 rule60 C(=O)[C;!H0][N+,n+]
0 0 rule61 C(=O)[N,O]C(=O)
0 0 rule62 C(=O)C[N,O]CC(=O)
0 0 rule63 C(=O)N(C(=O))OC(=O)
0 0 rule64 C(=O)OC(=O)
0 0 rule65 C(=O)Oc1c(F)c(F)c(F)c(F)c1(F)
0 0 rule66 C(=O)Oc1ccc(N(=O)=O)cc1
0 0 rule67 C(=O)Onnn
0 0 rule68 C=N[N;H1]
0 0 rule69 C=P
0 0 rule70 Cl(=O)OCC1
0 0 rule71 Cl(O)C(O)C(O)C(O)OC1
0 0 rule72 Cl[N;H1]CCC(=O)Cl
0 0 rule73 Cl[O,S,N]Cl
0 0 rule74 c1c(=O)nc(=O)c1
0 0 rule75 CC[C;H1;!R]=[C;H1;!R]C(=O)[C;X4;!R]
0 0 rule76 CCC([C;H2]C(=O)[C;X4])[F,Cl,Br,I,$(S(=O)(=O))]
0 0 rule77 N#CC(=O)
0 0 rule78 N#CC[OH]
0 0 rule79 N[CH2]C#N
0 0 rule80 N[Cl,Br,I,F]
0 0 rule81 N=C=[S,O]
0 0 rule82 N=C=N
0 0 rule83 N=NC(=S)N
0 0 rule84 N1CN1
0 0 rule85 NOS(=O)(=O)
0 0 rule86 NP(=O)(N)N
0 0 rule87 O=C1[#6]~[#6]C(=O)[#6]~[#6]1
0 0 rule88 O=CN=[N+]=[N-]
0 0 rule89 O=CO[n,$(N(C=O)(C=O))]
0 0 rule90 OO
0 0 rule91 OS(=O)(=O)C(F)(F)F
0 0 rule92 P(=O)([OH])OP(=O)[OH]
0 0 rule93 P(=S)(S)S
0 0 rule94 P(OCC)(OCC)(=O)C#N
0 0 rule95 S(=O)(=O)[F,Cl,Br,I,$(S(=O)(=O))]
0 0 rule96 S(=O)(=O)C#N
0 0 rule97 S~S
0 0 rule98 s1****1[N;H2]
0 0 rule99 slnccn1
0 0 rule100 SC#N

```

# ZINC:Command language

## From DISI

You can control ZINC-12 remotely by hand writing URLs. This document is a guide to how to use them.

URLs are generally of the form: `http://zinc.docking.org/results?category.field=argument&category2.field2=argument2`

Multiple queries and format instructions may be supplied in a single transaction.

## Quick Search Bar

You can access all the functionality of the Quick Search Bar using the `/find/` command.

```
e.g. http://zinc.docking.org/find/12346+3432+3343  
e.g. http://zinc.docking.org/find/drug:ibuprofen
```

## Contents

- 1 Quick Search Bar
- 2 Structure
- 3 Catalog
- 4 ZINC ID
- 5 Annotation
- 6 Prediction
- 7 Clustered Targets
- 8 Reports, Formats, Filters

## Structure

The SMILES and SMARTS must be URL encoded.

```
structure.similarity=n where 0<=n<=1  
structure.smiles=<SMILES>  
structure.substructure=<SMARTS>
```

```
e.g. http://zinc.docking.org/results.?structure.smiles=C1CCCC1&structure.similarity=1.
```

## Catalog

```
catalog.purchasability={not-for-sale, in-stock, on-demand, boutique, agent, collabocule  
catalog.name=<name>
```

```
e.g. http://zinc.docking.org/results?catalog.purchasability=in-stock  
e.g. http://zinc.docking.org/results?catalog.name=:ChemBridge,Molport
```

## ZINC ID

```
zinc.id =
```

```
e.g.http://zinc.docking.org/results?zinc.id=29323
```

## Annotation

```
annotation.swiss_prot=Q9R297  
annotation.uniprot=HRH1_HUMAN  
annotation.term=:Q9R297,HRH1_HUMAN
```

```
e.g.http://zinc.docking.org/results?annotation.uniprot=HRH1_HUMAN
```

## Prediction

```
prediction.swiss_prot=Q9R297  
prediction.uniprot=HRH1_HUMAN
```

```
e.g.http://zinc.docking.org/results?prediction.swissprot=Q112345
```

## Clustered Targets

```
target.code=drd2-1-e
```

```
e.g.http://zinc.docking.org/results?target.code=drd2-1-e
```

## Reports, Formats, Filters

```
page.format=X where X = sdf, mol2, smi, Flexibase
filter.representation=X where X= usual, single, metal, all, ref, mid, hi, lo
filter.purchasability=X where X= in-stock, on-demand, purchasable, not-for-sale, all,
e.g. http://zinc.docking.org/results?annotation.name=DRD2_HUMAN&filter.purchasability=F
```

Retrieved from "[http://wiki.bkslab.org/index.php/ZINC:Command\\_language](http://wiki.bkslab.org/index.php/ZINC:Command_language)"

Category: ZINC

---

- This page was last modified 00:22, 5 April 2012.
- This page has been accessed 648 times.
- Content is available under GNU Free Documentation License 1.2.
- Privacy policy
- About DISI
- Disclaimers



# Quick Search Bar

## From DISI

(Redirected from QSB)

The Quick Search Bar may be used to enter free-form text to query ZINC. The goal is to offer fast google-like simplicity. The input is interpreted as follows. Wildcards are supported

## Number(s)

If it is a number, interpret as a ZINC ID. To force this behavior, prefix with zinc:

```
e.g. (All are supported)
zinc:32768
32768
32768 55535 7
```

## Number-Number-Number

If it is of the form number-number-number, interpret as a CAS number. For force this behavior, prefix with cas:

```
e.g. (All are supported)
cas:5-6-10
6-54-2
3-5-6 3-4-2
```

## Contents

- 1 Number(s)
- 2 Number-Number-Number
- 3 SMILES and SMARTS
- 4 Name
- 5 Target
- 6 Catalog

## SMILES and SMARTS

If it is a valid SMILES, interpret as "90% similar to". To force this behavior, prefix with smiles:

Optionally after SMILES (SMARTS) add identical, exact, substructure, 80% or 0.8 (or any value) for corresponding searches.

```
e.g. (All are supported)
smiles:O=C1CCN1 substructure
```

```
smiles:O=C1CCN1 77%  
C1CCNCC1 exact
```

## Name

Attempt to interpret as name of molecule. To force this behavior, prefix with name: or drug:

```
e.g. (All are supported)  
drug:cetirizine  
drug:*pram  
ibuprofen
```

## Target

Attempt to interpret as target name. Uniprot and SwissProt codes as well as target names are supported. To force this behavior, prefix with target:

```
e.g. (All are supported)  
target:5ht1a*  
target:hdac*  
target:DRD2_HUMAN  
DRD2_HUMAN  
target:Q2LFS1
```

## Catalog

Attempt to interpret as catalog name. To force this behavior, prefix with catalog:

```
e.g. (All are supported)  
ChemBridge  
catalog:Enamine  
catalog:asin
```

Attempt to interpret as a catalog code, optionally prefixed with catalog name. Thus

```
e.g. (All are supported)  
ChemBridge T12345  
vendor:ChemBridge T12345  
Enamine 194394*  
vendor:12345 (any compound called 12345 by any vendor)
```

Retrieved from "[http://wiki.bkslab.org/index.php/Quick\\_Search\\_Bar](http://wiki.bkslab.org/index.php/Quick_Search_Bar)"

- This page was last modified 23:30, 23 February 2012.
- This page has been accessed 56 times.
- Content is available under GNU Free Documentation License 1.2.
- Privacy policy
- About DISI
- Disclaimers

# How to link to ZINC

## From DISI

How to link to ZINC.

This is how to link to ZINC from other websites.

## By ZINC ID

### Contents

- 1 By ZINC ID
- 2 By ChEMBL (or other catalog or vendor) ID
- 3 Dynamic link on the fly - Javascript - how to include in your page
- 4 By SMILES
- 5 By InChI
- 6 By CAS #
- 7 By Vendor / Vendor code
- 8 By Name
- 9 By Ring
- 10 By Target
  - 10.1 By SwissProt
  - 10.2 By UniProt
  - 10.3 By Target Name

- <http://zinc.docking.org/substance/<zincid>>

For example, to link to 16610261, use the URL

- <http://zinc.docking.org/substance/16610261>

## By ChEMBL (or other catalog or vendor) ID

<http://zinc.docking.org/results?page.format=zinc&filter.purchasable=purchasable&zinc.id>

ZINC\_ID can be one or more ZINC ID numbers separated by white-space. e.g.

```
wget -qO- http://zinc.docking.org/results?page.format=zinc&filter.purchasable=purchasable
```

```
http://zinc.docking.org/catalogs/chembl12/$CHEMBLID.zinc?filter.purchasability=purchasable
```

CHEMBLID can be a single chembl code. e.g: To check if the ChEMBL ID "CHEMBL25" (One of two codes for Aspirin) is purchasable you would request the following URL:

```
http://zinc.docking.org/catalogs/chembl12/CHEMBL25.zinc?filter.purchasability=purchasable
```

This will return a text file with an integer (53) corresponding to the same ZINC compound. There may be more than one compound if the ChEMBL annotation is shared between multiple ZINC Substances in which case multiple IDs will be returned, each on it's own line.

## Dynamic link on the fly - Javascript - how to include in your page

The code for ChEMBL should be:

```
<script type="text/javascript" src="http://zinc.docking.org/js/embed.js"></script>
<script type="text/javascript">
window.zinc.embed(
  'zinc-link', // Embed in the item with id "zinc-link"
  {
    "filter.purchasability": "purchasable",
    "catalog.name": "chembl13",
    "catalog.code": "CHEMBL25" // CHANGE THIS LINE TO APPROPRIATE CHEMBL ID
  },
  true // Hide on no match
        // Optional 4th argument will override the
        // default ZINC logo for one of the designer's
        // choice.
);
</script>
```

## By SMILES

- <http://zinc.docking.org/results/structure?>

`structure.similarity=1.0&structure.smiles=<URL-encoded-smiles>`

For example, to link to benzene, `c1ccccc1`, use the URL

- [http://zinc.docking.org/results/structure?  
structure.similarity=1.0&structure.smiles=c1ccccc1](http://zinc.docking.org/results/structure?structure.similarity=1.0&structure.smiles=c1ccccc1)

Some molecules require URL encoding if they use =, (, ) @, [, ], +, #, \, \*, ., ,

The translation is as follows: @ = %40, \ = %5c, [ = %5b, ] = %5d, # = %23, ( = %28, ) = %29, \* = %2a, + = %2b, , = %2c

These are all standard hexadecimal encoding of characters that have special meaning in a URL and must be encoded to be transmitted to ZINC.

## By InChI

We currently do not support InChI, but we are working on it.

## By CAS #

- <http://zinc.docking.org/cas/<casnumber>>

For example, benzene, with CAS number 71-43-2, can be looked up as follows:

- <http://zinc.docking.org/cas/71-43-2>

To get benzene in SMILES format, use <http://zinc.docking.org/cas/71-43-2.smi>

## By Vendor / Vendor code

## By Name

- <http://zinc.docking.org/synonym/<name>>

For example, to find Delta-9-THC, use: <http://zinc.docking.org/synonym/delta-9-thc>

To get this molecule in SDF format, use: <http://zinc.docking.org/synonym/delta-9-thc.sdf>

## By Ring

In progress, coming soon. Format will be

<http://zinc.docking.org/find/ring:indole>

- in progress \*

## By Target

<http://zinc.docking.org/results/comboination?filter.purchasability=purchasable&annotatic>

## By SwissProt

[http://zinc.docking.org/results/comboination?  
filter.purchasability=purchasable&annotation.name=HCN2\\_MOUSE](http://zinc.docking.org/results/comboination?filter.purchasability=purchasable&annotation.name=HCN2_MOUSE)

## By UniProt

[http://zinc.docking.org/results/comboination?  
filter.purchasability=purchasable&annotation.name=HCN2\\_MOUSE](http://zinc.docking.org/results/comboination?filter.purchasability=purchasable&annotation.name=HCN2_MOUSE)

## By Target Name

Retrieved from "[http://wiki.bkslab.org/index.php/How\\_to\\_link\\_to\\_ZINC](http://wiki.bkslab.org/index.php/How_to_link_to_ZINC)"

---

- This page was last modified 00:19, 13 March 2012.
- This page has been accessed 37 times.
- Content is available under GNU Free Documentation License 1.2.
- Privacy policy
- About DISI
- Disclaimers

# ZINC processing pipeline

## From DISI

(Redirected from ZPP)

Each molecule in ZINC is processed via our ZINC processing pipeline. This process is embodied in a set of scripts that we continue to refine as we discover problems.

Frankly, we hope people will simply use ZINC rather than trying to reproduce it. Still, in the interests of clarity, transparency, truth, justice and the Canadian Way (TM), here is our current protocol.

- 1. If you have 2D SDF, convert it to isomeric SMILES.
- 2. `sed -e 's/N=S=N/nsn/g' 2.ism > 2-out.ism`
- 3. Use molinspiration mitools/mib to eliminate broken SMILES:

```
java -jar /raid1/soft/mitools/mib.jar -singlepart -onlyOrganic -normalizeCharges -f $1
```

- 4. Use OEChem to remove molecules with problematic functional groups:

```
filter.py rules.txt 4.ism 4-out.ism > filterlog.txt
```

see [http://blaster.docking.org/filtering/rules\\_default.txt](http://blaster.docking.org/filtering/rules_default.txt) for current rules.

- 5. select only 4 of stereochemical expansions from previous step. We just take the first 4, but you can imagine better ways of making the selection.
- 6. get rid of bogus stereochemistry at nitrogen:

```
sed -e 's/[N@]/N/g' -e 's/[N@@]/N/g' -e 's/[N@H+]/[NH+]/g' -e 's/[N@@H+]/[NH
```

- 7. If the molecule is already in ZINC, eliminate it from the list.
- 8. Generate trial 3D structure with corina.

```
corina -d neu,wh,rc,mc=1,canon -i t=smiles -o t=sdf < 1a.ism > 2.sdf
```



- 9. generate reference pH state using Schrodinger's Epik.

```
epik -ph 7.05 -ms 1 -imae A.mae -omae B.mae -WAIT
```

- 10. generate mid, hi and lo pH subsets

```
mid: setenv EPIK "-ph 7.0 -pht 1 -tp 0.20"  
hi: setenv EPIK "-ph 8.5 -pht 0.75 -tp 0.20"  
lo: setenv EPIK "-ph 5.5 -pht 0.75 -tp 0.20"  
epik $EPIK -imae A.mae -omae B.mae -WAIT
```

- 11. For each subset (ref, mid, hi, lo) use Corina to generate 3D model of the relevant protonated state.

```
corina -d rc,flapn,de=5,mc=2 -i t=mol2 -o t=mol2
```

That's really it. There is more to do with loading ZINC, but to generate the models, that is what we think you need to know. Good luck!

-- John Irwin. March 2009.

Retrieved from "[http://wiki.bkslab.org/index.php/ZINC\\_processing\\_pipeline](http://wiki.bkslab.org/index.php/ZINC_processing_pipeline)"

---

- This page was last modified 17:28, 10 March 2009.
- This page has been accessed 236 times.
- Content is available under GNU Free Documentation License 1.2.
- Privacy policy
- About DISI
- Disclaimers
